# Supplementary material for: Crystallographic, spectroscopic, and computational characterization of a diiodonaphthoquinone diarylethene photochrome: halogen bonding and photocrystallography
Source: Royal Society of Chemistry journal article supplement (doi:10.1039/d4ce00112e), 2024-01-01
Supplement: d4ce00112e1.pdf [file d4ce00112e1.pdf]

# Supporting Information

## Crystallographic, Spectroscopic, and Computational Characterization of a Diiodonaphthoquinone Diarylethene Photochrome: Halogen Bonding and Photocrystallography

Shea D. Myers<sup>a,†</sup>, Zoe Y. Marr<sup>a,†</sup>, Jade A. Sency<sup>b</sup>, Travis B. Mitchell,<sup>a</sup> Jason B. Benedict<sup>a,\*</sup> and Dinesh G. Patel<sup>b,\*</sup>

\*dgp15@psu.edu

\*jbb6@buffalo.edu

<sup>a</sup> Department of Chemistry, University at Buffalo, Buffalo NY 14228

<sup>b</sup> Department of Chemistry, The Pennsylvania State University, Hazleton PA 18202

<sup>†</sup> both authors contributed equally to this work

### Table of Contents

|                                                                                                                                                                                               |           |
|-----------------------------------------------------------------------------------------------------------------------------------------------------------------------------------------------|-----------|
| <b>Figure S1.</b> Absorption spectra of compounds <b>1a</b> and <b>1b</b> in methylene chloride ( $9.6 \times 10^{-5}$ M).                                                                    | <b>S2</b> |
| <b>Figure S2.</b> Time resolved UV-Vis spectra of a solution of compounds <b>1a</b> and <b>1b</b> upon irradiation with 430 nm light ( $9.6 \times 10^{-5}$ M solution in methylene chloride) | <b>S3</b> |
| <b>Figure S3.</b> Time resolved UV-Vis spectra of a solution of compounds <b>1a</b> and <b>1b</b> upon irradiation with 623 nm light ( $9.6 \times 10^{-5}$ M solution in methylene chloride) | <b>S4</b> |
| <b>Figure S4.</b> Solid-state UV-vis spectrum of a microcrystalline thin film (thickness 5.5 $\mu\text{m}$ ) of <b>1b</b> .                                                                   | <b>S4</b> |
| <b>Figure S5:</b> Images illustrating the molecular orbitals associated with the three lowest energy electronic transitions with oscillator strength greater than 0.1 for <b>XB-dimer</b> .   | <b>S5</b> |
| <b>Table S1:</b> Electronic transitions and orbital contributions for the calculated UV-vis spectra of <b>1a</b> , <b>1b</b> , and <b>XB-dimer</b> .                                          | <b>S6</b> |
| <b>Table S2.</b> First eight electronic transitions with oscillator strengths greater than 0.01 for <b>1a</b> , <b>1b</b> , and <b>XB-dimer</b> .                                             | <b>S7</b> |
| <b>Table S3.</b> Crystallographic information for <b>1b</b> and <b>1b-irradiated</b> .                                                                                                        | <b>S8</b> |

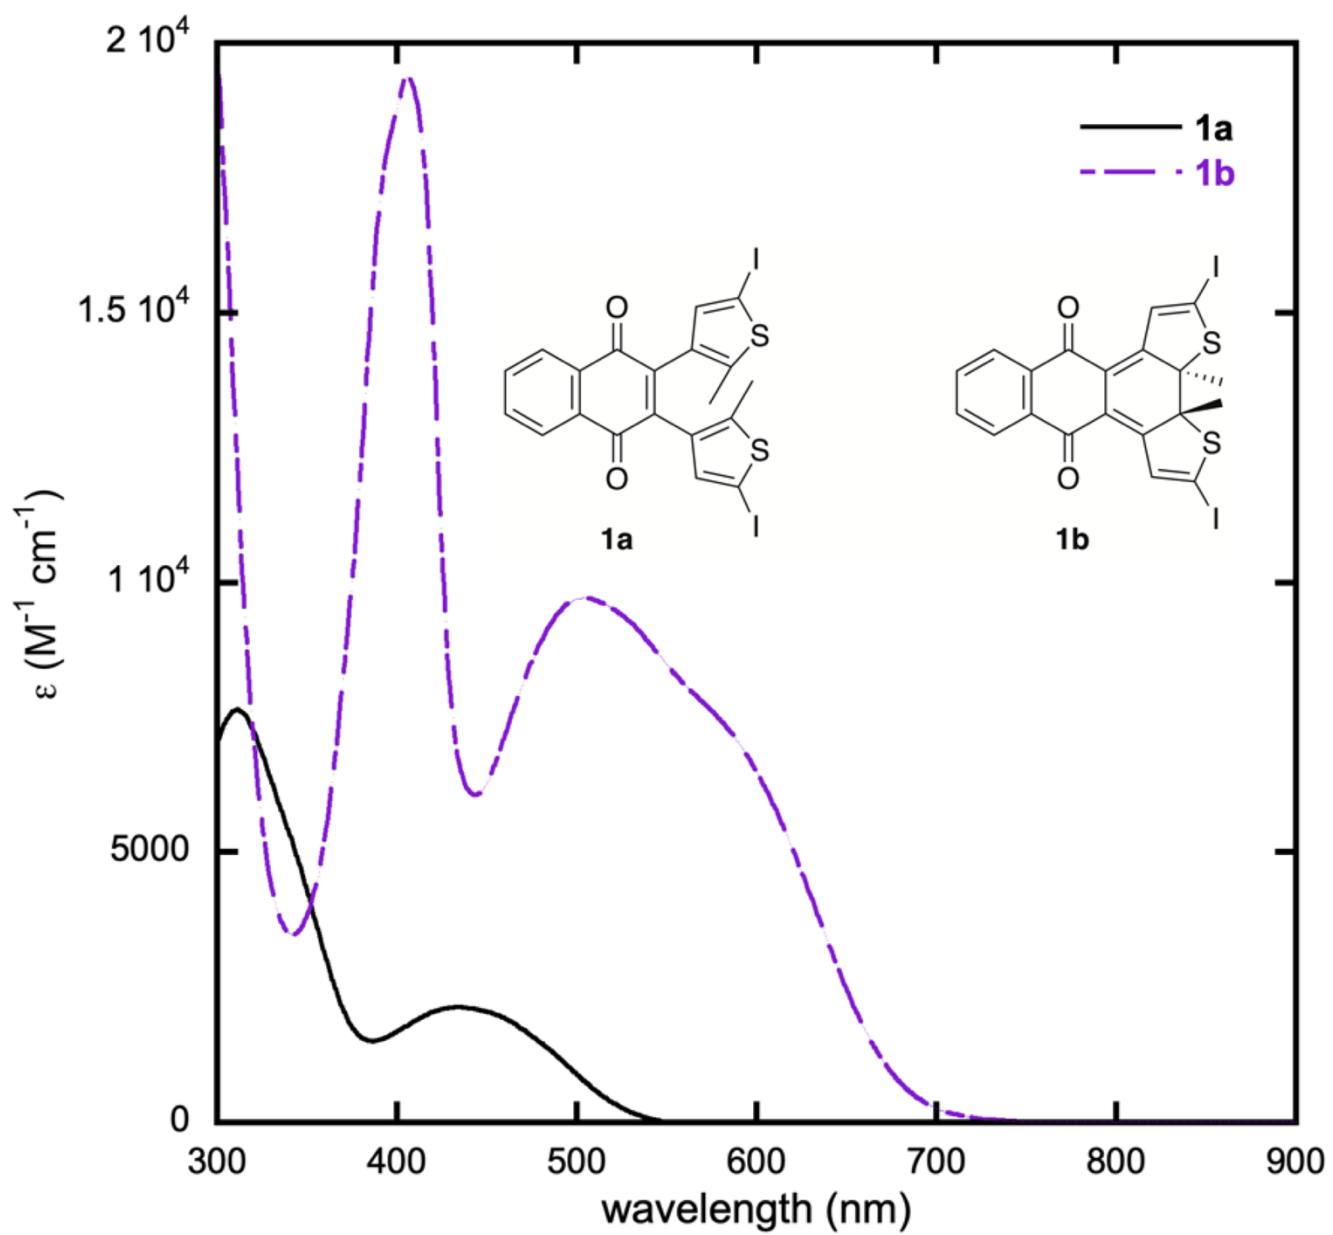

**Figure S1.** Absorption spectra of compounds **1a** and **1b** in methylene chloride ( $9.6 \times 10^{-5}$  M).

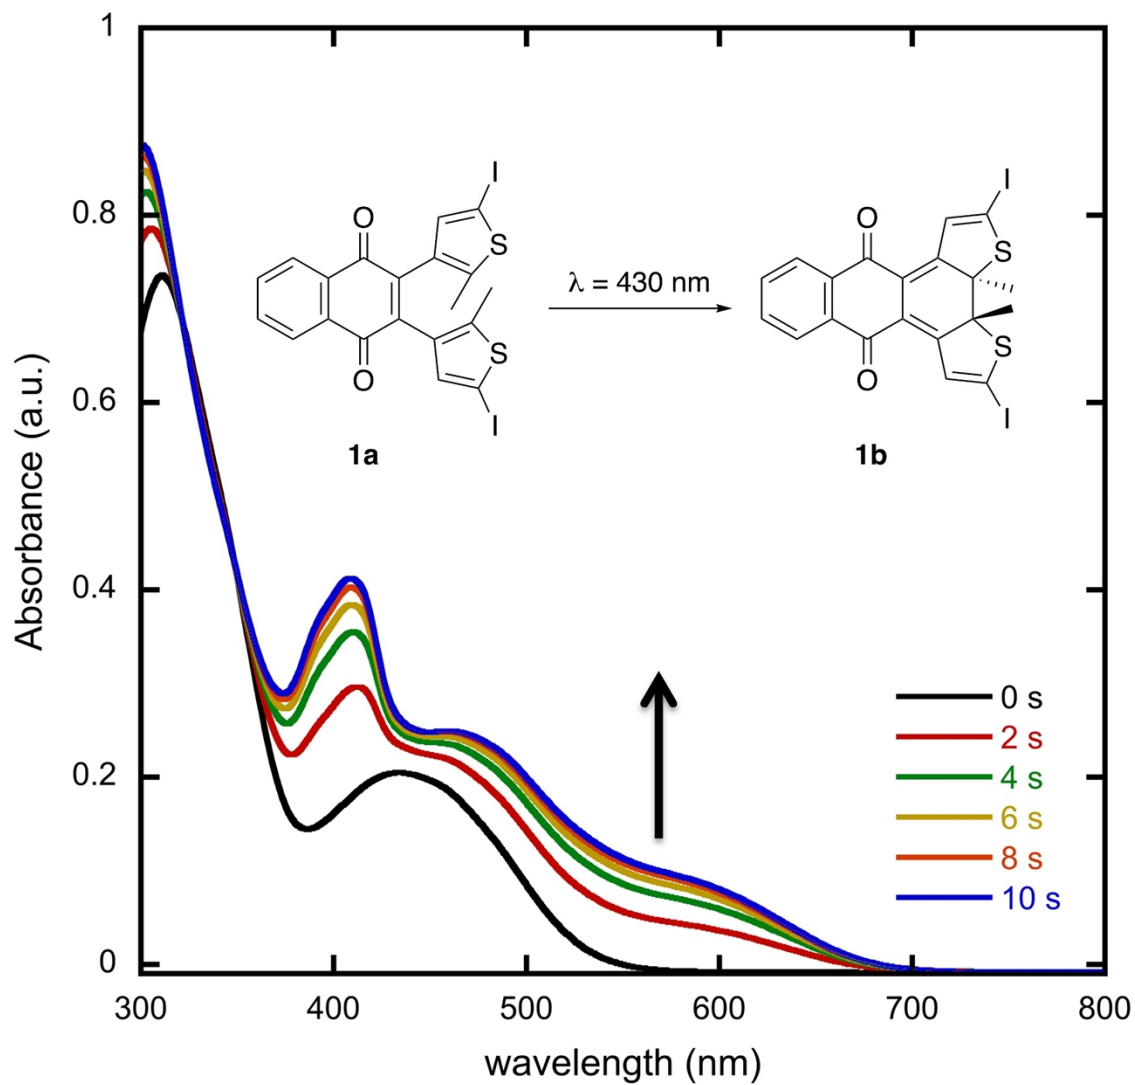

**Figure S2.** Time resolved UV-Vis spectra of a solution of compounds **1a** and **1b** upon irradiation with 430 nm light ( $9.6 \times 10^{-5}$  M solution in methylene chloride).

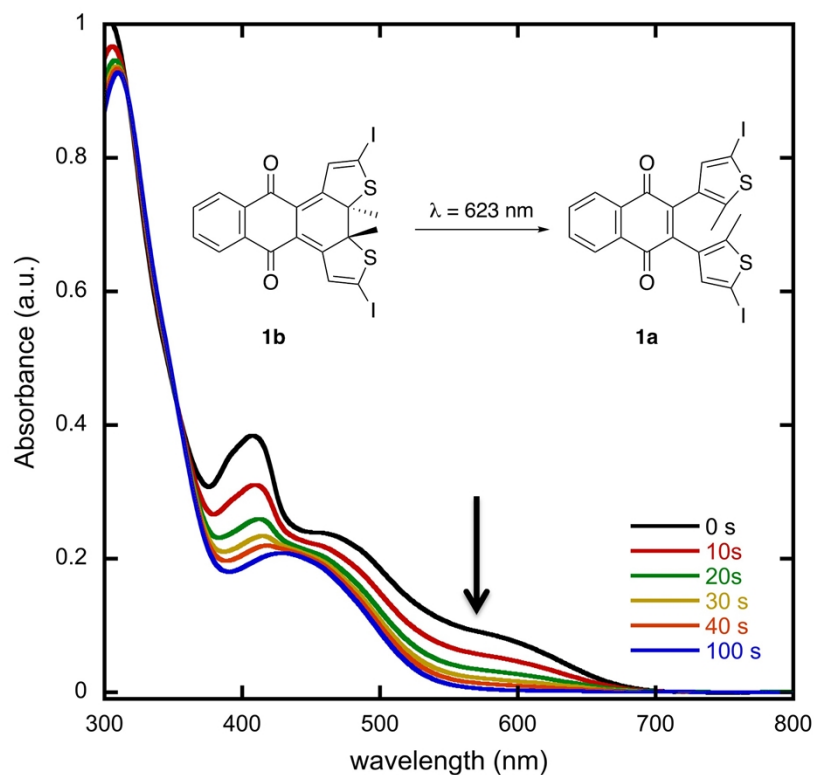

**Figure S3.** Time resolved UV-Vis spectra of a solution of compounds **1a** and **1b** upon irradiation with 623 nm light ( $9.6 \times 10^{-5} \text{ M}$  solution in methylene chloride).

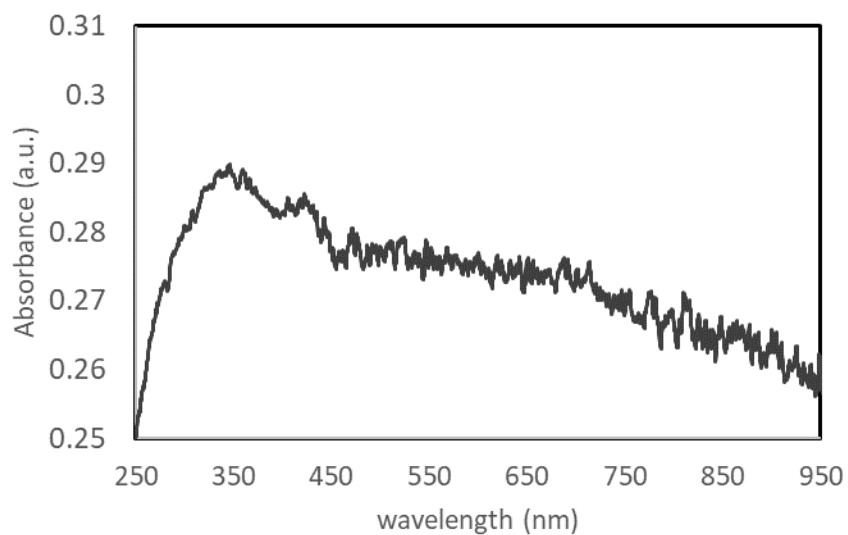

**Figure S4.** Solid-state UV-vis spectrum of a microcrystalline thin film (thickness 5.5  $\mu\text{m}$ ) of **1b**.

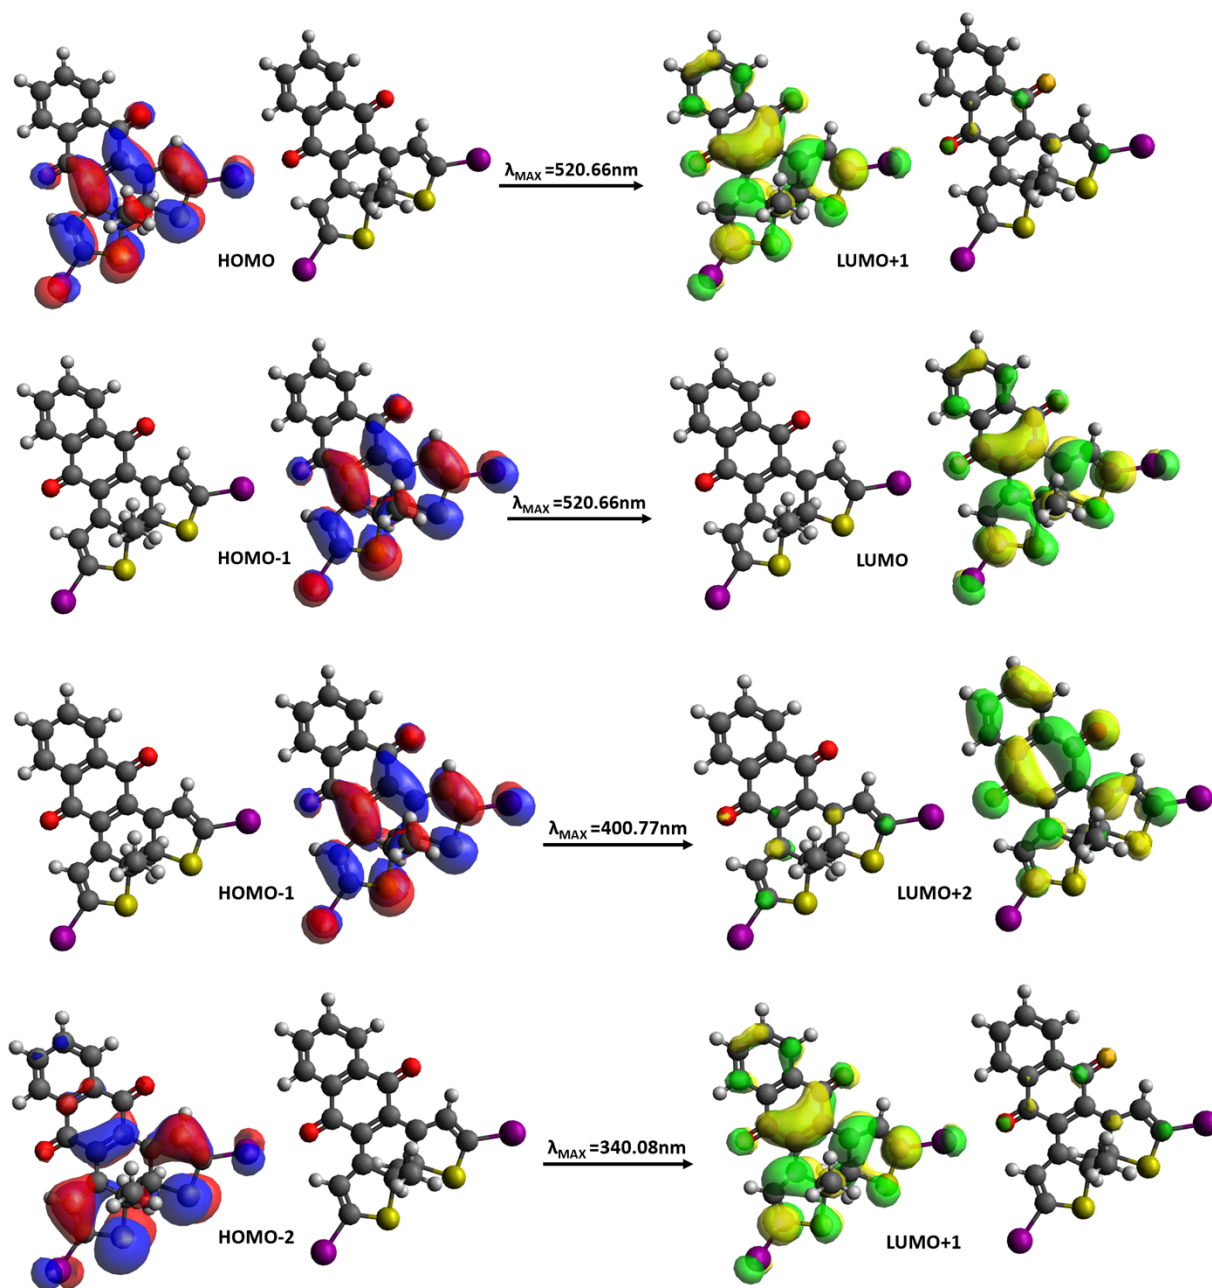

**Figure S5:** Images illustrating the molecular orbitals associated with the three lowest energy electronic transitions with oscillator strength greater than 0.1 for **XB-dimer**.

**Table S1:** Electronic transitions and orbital contributions for the calculated UV-vis spectra of **1a**, **1b**, and **XB-dimer**.

| Molecule        | Transition | Excited state                                                                                                                                       | Singlet-A                                                                                                                    |
|-----------------|------------|-----------------------------------------------------------------------------------------------------------------------------------------------------|------------------------------------------------------------------------------------------------------------------------------|
| <b>1A</b>       | 427.55 nm  | 106→116 (HOMO-9→LUMO)<br>107→116 (HOMO-8→LUMO)<br>108→116 (HOMO-7→LUMO)<br>111→116 (HOMO-4→LUMO)<br>115→116 (HOMO→LUMO)                             | 0.12761 (3.2569%)<br>-0.39152 (30.658%)<br>0.15848 (5.0232%)<br>-0.12168 (2.9612%)<br>0.50228 (50.457%)                      |
| <b>1A</b>       | 405.81 nm  | 104→117 (HOMO-11→LUMO+1)<br>106→116 (HOMO-9→LUMO)<br>107→116 (HOMO-8→LUMO)<br>111→116 (HOMO-4→LUMO)<br>113→116 (HOMO-2→LUMO)<br>115→116 (HOMO→LUMO) | 0.10086 (2.0354%)<br>-0.21621 (9.3494%)<br>0.36955 (27.313%)<br>0.11118 (2.4722%)<br>-0.23653 (11.189%)<br>0.45114 (40.705%) |
| <b>1A</b>       | 318.00 nm  | 106→116 (HOMO-9→LUMO)<br>108→116 (HOMO-7→LUMO)<br>113→116 (HOMO-2→LUMO)<br>115→116 (HOMO→LUMO)                                                      | -0.10104 (2.0418%)<br>-0.17762 (6.3098%)<br>0.63414 (80.427%)<br>0.15345 (4.7094%)                                           |
| <b>1A</b>       | 283.17 nm  | 105→116 (HOMO-10→LUMO)<br>109→116 (HOMO-6→LUMO)<br>112→116 (HOMO-3→LUMO)                                                                            | -0.12514 (3.1320%)<br>0.17176 (2.9501%)<br>0.63822 (81.465%)                                                                 |
| <b>1B</b>       | 500.02 nm  | 115→116 (HOMO→LUMO)                                                                                                                                 | 0.69716 (97.206%)                                                                                                            |
| <b>1B</b>       | 382.27 nm  | 106→117 (HOMO-9→LUMO+1)<br>115→117 (HOMO→LUMO+1)                                                                                                    | -0.16453 (5.4140%)<br>0.66390 (88.153%)                                                                                      |
| <b>1B</b>       | 327.70 nm  | 105→117 (HOMO-10→LUMO+1)<br>106→117 (HOMO-9→LUMO+1)<br>110→116 (HOMO-5→LUMO)<br>114→116 (HOMO-1→LUMO)                                               | 0.14425 (4.16161%)<br>-0.15038 (4.5228%)<br>-0.17576 (6.17832%)<br>0.61850 (76.508%)                                         |
| <b>XB-dimer</b> | 520.66 nm  | 229→231 (HOMO-1→LUMO)<br>230→232 (HOMO→LUMO+1)                                                                                                      | 0.52634 (55.407%)<br>0.44203 (39.078%)                                                                                       |
| <b>XB-dimer</b> | 400.77 nm  | 229→232 (HOMO-1→LUMO+1)<br>229→233 (HOMO-1→LUMO+2)<br>230→234 (HOMO→LUMO+3)                                                                         | 0.17796 (6.3339%)<br>0.62390 (77.850%)<br>-0.16481 (5.4325%)                                                                 |
| <b>XB-dimer</b> | 340.08 nm  | 210→234 (HOMO-20→LUMO+3)<br>223→232 (HOMO-7→LUMO+1)<br>228→232 (HOMO-2→LUMO+1)<br>230→233 (HOMO→LUMO+2)                                             | 0.13874 (3.8498%)<br>0.10656 (2.2710%)<br>0.62873 (79.060%)<br>-0.14465 (4.1847%)                                            |

**Table S2.** First eight electronic transitions with oscillator strengths greater than 0.01 for **1a**, **1b**, and **XB-dimer**.

| f>0.01       | Species        | DAE-NQ-I ( <b>1a</b> ) | DAE-NQ-I-c ( <b>1b</b> ) | XB-dimer |
|--------------|----------------|------------------------|--------------------------|----------|
| Transition 1 | $\lambda$ (nm) | 427.55                 | 500.02                   | 520.66   |
|              | f              | 0.0155                 | 0.1413                   | 0.3058   |
| Transition 2 | $\lambda$ (nm) | 405.81                 | 382.28                   | 400.77   |
|              | f              | 0.0302                 | 0.2685                   | 0.4720   |
| Transition 3 | $\lambda$ (nm) | 325.00                 | 360.91                   | 398.48   |
|              | f              | 0.0138                 | 0.1212                   | 0.1535   |
| Transition 4 | $\lambda$ (nm) | 318.00                 | 327.70                   | 372.89   |
|              | f              | 0.0359                 | 0.1419                   | 0.0296   |
| Transition 5 | $\lambda$ (nm) | 283.17                 | 263.20                   | 362.98   |
|              | f              | 0.0785                 | 0.0144                   | 0.0576   |
| Transition 6 | $\lambda$ (nm) | 281.26                 | 258.60                   | 356.19   |
|              | f              | 0.0621                 | 0.0795                   | 0.0542   |
| Transition 7 | $\lambda$ (nm) | 272.30                 | 256.38                   | 340.94   |
|              | f              | 0.0863                 | 0.1012                   | 0.0840   |
| Transition 8 | $\lambda$ (nm) | 248.04                 | 253.10                   | 340.08   |
|              | f              | 0.0896                 | 0.0189                   | 0.1216   |

**Table S3.** Crystallographic information for **1b** and **1b-irradiated**.

| Identification code                    | <b>1b</b>                                                                    | <b>1b-irradiated</b>                                                         |
|----------------------------------------|------------------------------------------------------------------------------|------------------------------------------------------------------------------|
| Empirical formula                      | C <sub>20</sub> H <sub>12</sub> I <sub>2</sub> O <sub>2</sub> S <sub>2</sub> | C <sub>20</sub> H <sub>12</sub> I <sub>2</sub> O <sub>2</sub> S <sub>2</sub> |
| Formula weight                         | 602.22                                                                       | 602.22                                                                       |
| Temperature/K                          | 298                                                                          | 298                                                                          |
| Crystal system                         | monoclinic                                                                   | monoclinic                                                                   |
| Space group                            | P2 <sub>1</sub>                                                              | P2 <sub>1</sub>                                                              |
| a/Å                                    | 11.9319(10)                                                                  | 11.911(4)                                                                    |
| b/Å                                    | 7.4644(6)                                                                    | 7.520(3)                                                                     |
| c/Å                                    | 12.4586(10)                                                                  | 12.479(5)                                                                    |
| $\alpha$ /°                            | 90                                                                           | 90                                                                           |
| $\beta$ /°                             | 117.024(2)                                                                   | 117.134(9)                                                                   |
| $\gamma$ /°                            | 90                                                                           | 90                                                                           |
| Volume/Å <sup>3</sup>                  | 988.47(14)                                                                   | 994.7(7)                                                                     |
| Z                                      | 2                                                                            | 2                                                                            |
| $\rho_{\text{calc}}$ /cm <sup>3</sup>  | 2.023                                                                        | 2.011                                                                        |
| $\mu$ /mm <sup>-1</sup>                | 3.405                                                                        | 3.383                                                                        |
| F(000)                                 | 572.0                                                                        | 572.0                                                                        |
| Crystal size/mm <sup>3</sup>           | 0.5 × 0.25 × 0.15                                                            | 0.4 × 0.1 × 0.05                                                             |
| Radiation                              | MoK $\alpha$ ( $\lambda$ = 0.71073)                                          | MoK $\alpha$ ( $\lambda$ = 0.71073)                                          |
| 2 $\theta$ range for data collection/° | 3.67 to 67.31                                                                | 3.842 to 53.6                                                                |

|                                                |                                                               |                                                               |
|------------------------------------------------|---------------------------------------------------------------|---------------------------------------------------------------|
| Index ranges                                   | $-18 \leq h \leq 18, -11 \leq k \leq 11, -19 \leq l \leq 19$  | $-15 \leq h \leq 14, -9 \leq k \leq 8, -12 \leq l \leq 15$    |
| Reflections collected                          | 26911                                                         | 7591                                                          |
| Independent reflections                        | 7775 [ $R_{\text{int}} = 0.0517, R_{\text{sigma}} = 0.0602$ ] | 3542 [ $R_{\text{int}} = 0.0711, R_{\text{sigma}} = 0.1034$ ] |
| Data/restraints/parameters                     | 7775/1/238                                                    | 3542/1/241                                                    |
| Goodness-of-fit on $F^2$                       | 1.106                                                         | 0.990                                                         |
| Final R indexes [ $I \geq 2\sigma(I)$ ]        | $R_1 = 0.0432, wR_2 = 0.1184$                                 | $R_1 = 0.0520, wR_2 = 0.1111$                                 |
| Final R indexes [all data]                     | $R_1 = 0.0768, wR_2 = 0.1317$                                 | $R_1 = 0.1261, wR_2 = 0.1358$                                 |
| Largest diff. peak/hole / $e \text{ \AA}^{-3}$ | 1.90/-1.46                                                    | 0.99/-0.78                                                    |
| Flack parameter                                | 0.47(6)                                                       | 0.37(17)                                                      |
